# Supplementary material for: Dietary intake of vitamin A, lung function and incident asthma in childhood
Source: PubMed Central journal article supplement (PMC8551559; doi:10.1183/13993003.04407-2020), 2021-10-28

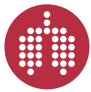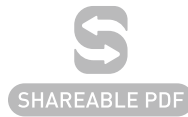

# Dietary intake of vitamin A, lung function and incident asthma in childhood

Mohammad Talaei <sup>1</sup>, David A. Hughes <sup>2</sup>, Osama Mahmoud <sup>2</sup>, Pauline M. Emmett <sup>3</sup>, Raquel Granell <sup>2</sup>, Stefano Guerra <sup>4</sup> and Seif O. Shaheen <sup>1</sup>

<sup>1</sup>Institute of Population Health Sciences, Barts and The London School of Medicine and Dentistry, Queen Mary University of London, London, UK. <sup>2</sup>MRC Integrative Epidemiology Unit, Population Health Sciences, Bristol Medical School, University of Bristol, Bristol, UK. <sup>3</sup>Centre for Academic Child Health, Population Health Sciences, Bristol Medical School, University of Bristol, Bristol, UK. <sup>4</sup>Asthma and Airway Disease Research Center, University of Arizona, Tucson, AZ, USA.

Corresponding author: Mohammad Talaei ([m.talaei@qmul.ac.uk](mailto:m.talaei@qmul.ac.uk))

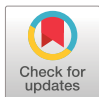

Shareable abstract (@ERSpublications)

**A higher intake of preformed vitamin A, but not pro-vitamin  $\beta$ -carotene, in mid-childhood was associated with higher subsequent lung function and lower risk of fixed airflow limitation and incident asthma** <https://bit.ly/3d7PUca>

**Cite this article as:** Talaei M, Hughes DA, Mahmoud O, *et al.* Dietary intake of vitamin A, lung function and incident asthma in childhood. *Eur Respir J* 2021; 58: 2004407 [DOI: 10.1183/13993003.04407-2020].

This single-page version can be shared freely online.

Copyright ©The authors 2021.

This version is distributed under the terms of the Creative Commons Attribution Licence 4.0.

This article has supplementary material available from [erj.ersjournals.com](http://erj.ersjournals.com)

Received: 03 Dec 2020  
Accepted: 18 March 2021

## Abstract

**Background** Longitudinal epidemiological data are scarce on the relationship between dietary intake of vitamin A and respiratory outcomes in childhood. We investigated whether a higher intake of preformed vitamin A or pro-vitamin  $\beta$ -carotene in mid-childhood is associated with higher lung function and with asthma risk in adolescence.

**Methods** In the Avon Longitudinal Study of Parents and Children, dietary intakes of preformed vitamin A and  $\beta$ -carotene equivalents were estimated by food frequency questionnaire at 7 years of age. Post-bronchodilator forced expiratory volume in 1 s (FEV<sub>1</sub>), forced vital capacity (FVC) and forced expiratory flow at 25–75% of FVC (FEF<sub>25–75%</sub>) were measured at 15.5 years and transformed to z-scores. Incident asthma was defined by new cases of doctor-diagnosed asthma at age 11 or 14 years.

**Results** In multivariable adjusted models, a higher intake of preformed vitamin A was associated with higher lung function and a lower risk of incident asthma: comparing top versus bottom quartiles of intake, regression coefficients for FEV<sub>1</sub> and FEF<sub>25–75%</sub> were 0.21 (95% CI 0.05–0.38;  $p_{\text{trend}}=0.008$ ) and 0.18 (95% CI 0.03–0.32;  $p_{\text{trend}}=0.02$ ), respectively; odds ratios for FEV<sub>1</sub>/FVC below the lower limit of normal and incident asthma were 0.49 (95% CI 0.27–0.90;  $p_{\text{trend}}=0.04$ ) and 0.68 (95% CI 0.47–0.99;  $p_{\text{trend}}=0.07$ ), respectively. In contrast, there was no evidence for association with  $\beta$ -carotene. We also found some evidence for modification of the associations between preformed vitamin A intake and lung function by *BCMO1*, *NCOR2* and *SCGB1A1* gene polymorphisms.

**Conclusion** A higher intake of preformed vitamin A, but not  $\beta$ -carotene, in mid-childhood is associated with higher subsequent lung function and lower risk of fixed airflow limitation and incident asthma.

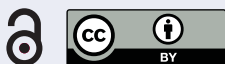

Supplement: ERJ-04407-2020.Shareable.pdf [file ERJ-04407-2020.Shareable.pdf]
